# Supplementary material for: Evaluation of the Efficacy and Safety of FFX Facet Cages Compared to Pedicle Screw Fixation in Patients with Lumbar Spinal Stenosis: A Long-Term Study
Source: bioRxiv or medRxiv preprint supplement (doi:10.1101/2023.12.18.23300167), 2023-12-19
Supplement: Supplementary file [file media-1.pdf]

**Evaluation of the Efficacy and Safety of FFX Facet Cages Compared to Pedicle Screw Fixation in Patients with Lumbar Spinal Stenosis: A Long-Term Study**

**Supplemental Materials**

**Supplemental Table 1.** Screening Log

|                                                            | FFX Group | PS Group |
|------------------------------------------------------------|-----------|----------|
| Number of patients identified via medical records search   | 131       | 101      |
| Number of patients screened                                | 84        | 75       |
| Number of screened patients who were not enrolled in study | 28        | 19       |
| Reason for non-enrollment                                  |           |          |
| - Did not meet all eligibility criteria                    | 11        | 4        |
| - Count not be reached                                     | 4         | 3        |
| - Refused to participate                                   | 6         | 6        |
| - Other                                                    | 7         | 6        |
| Total patients enrolled in study                           | 56        | 56       |

**Supplemental Table 2.** VAS Back Scores Descriptive Data – Pre-Op and Post 2 Year Follow-up

| Variable             | Statistics                       | Total<br>(N=112)   | FFX<br>(N=56)      | PS group<br>(N=56) |
|----------------------|----------------------------------|--------------------|--------------------|--------------------|
| Pre-op               | Number of data<br>(missing data) | 112 (0)            | 56 (0)             | 56 (0)             |
|                      | Mean ( $\pm$ Std)                | 6.40 ( $\pm$ 2.36) | 6.30 ( $\pm$ 2.69) | 6.50 ( $\pm$ 2.00) |
|                      | Median (Q1 ; Q3)                 | 7.00 (6.00;8.00)   | 7.00 (6.00;8.00)   | 7.00 (6.00;8.00)   |
|                      | (Min ; Max)                      | (0.00;10.00)       | (0.00;10.00)       | (0.00;9.00)        |
| 2+ Year<br>Follow-up | Number of data<br>(missing data) | 112 (0)            | 56 (0)             | 56 (0)             |
|                      | Mean ( $\pm$ Std)                | 3.49 ( $\pm$ 2.05) | 3.45 ( $\pm$ 2.17) | 3.54 ( $\pm$ 1.93) |
|                      | Median (Q1 ; Q3)                 | 3.00 (2.00;5.00)   | 3.00 (2.00;5.00)   | 3.00 (2.00;5.00)   |
|                      | (Min ; Max)                      | (0.00;8.00)        | (0.00;8.00)        | (0.00;8.00)        |

**Supplemental Table 3.** VAS Leg Scores Descriptive Data - Pre-Op and Post 2 Year Follow-up

| Variable             | Statistics                       | Total<br>(N=112)   | FFX<br>(N=56)      | PS group<br>(N=56) |
|----------------------|----------------------------------|--------------------|--------------------|--------------------|
| Pre-op               | Number of data<br>(missing data) | 112 (0)            | 56 (0)             | 56 (0)             |
|                      | Mean ( $\pm$ Std)                | 5.59 ( $\pm$ 2.77) | 5.73 ( $\pm$ 2.82) | 5.45 ( $\pm$ 2.73) |
|                      | Median (Q1 ; Q3)                 | 6.00 (4.50;7.50)   | 6.00 (4.50;8.00)   | 6.00 (4.50;7.00)   |
|                      | (Min ; Max)                      | (0.00;10.00)       | (0.00;10.00)       | (0.00;10.00)       |
| 2+ Year<br>Follow-up | Number of data<br>(missing data) | 112 (0)            | 56 (0)             | 56 (0)             |
|                      | Mean ( $\pm$ Std)                | 2.57 ( $\pm$ 2.34) | 2.38 ( $\pm$ 2.37) | 2.77 ( $\pm$ 2.30) |
|                      | Median (Q1 ; Q3)                 | 2.00 (0.00;4.00)   | 2.00 (0.00;4.00)   | 3.00 (0.00;4.00)   |
|                      | (Min ; Max)                      | (0.00;10.00)       | (0.00;10.00)       | (0.00;8.00)        |

**Supplemental Table 4.** ODI Scores Descriptive Data – Pre-Op and Post 2 Year Follow-up

| Variable             | Statistics                       | Total<br>(N=112)   | FFX<br>(N=56)      | PS group<br>(N=56) |
|----------------------|----------------------------------|--------------------|--------------------|--------------------|
| Pre-op               | Number of data<br>(missing data) | 111 (1)            | 56 (0)             | 55 (1)             |
|                      | Mean ( $\pm$ Std)                | 0.49 ( $\pm$ 0.16) | 0.52 ( $\pm$ 0.16) | 0.46 ( $\pm$ 0.16) |
|                      | Median (Q1 ; Q3)                 | 0.51 (0.36;0.62)   | 0.54 (0.40;0.64)   | 0.44 (0.33;0.58)   |
|                      | (Min ; Max)                      | (0.12;0.86)        | (0.12;0.86)        | (0.12;0.78)        |
| 2+ Year<br>Follow-up | Number of data<br>(missing data) | 111 (1)            | 56 (0)             | 55 (1)             |
|                      | Mean ( $\pm$ Std)                | 0.37 ( $\pm$ 0.19) | 0.35 ( $\pm$ 0.19) | 0.39 ( $\pm$ 0.20) |
|                      | Median (Q1 ; Q3)                 | 0.38 (0.22;0.53)   | 0.37 (0.20;0.51)   | 0.42 (0.26;0.56)   |
|                      | (Min ; Max)                      | (0.00;0.80)        | (0.00;0.64)        | (0.00;0.80)        |
